# Supplementary material for: The Q223R Polymorphism of the Leptin Receptor Gene as a Predictor of Weight Gain in Childhood Obesity and the Identification of Possible Factors Involved
Source: PubMed Central journal article supplement (PMC7288327; doi:10.3390/genes11050560), 2020-05-17
Supplement: genes-11-00560-s001.pdf [file genes-11-00560-s001.pdf]

## Supplementary Information.

**Supplementary Table:** Associations results between the 11 SNPs studied and anthropometric annual change variables in the codominant linear models adjusted by sex and age.

| SNP                            | CH <sup>(1)</sup> | Het <sup>(1)</sup> | VH <sup>(1)</sup> | Beta <sup>(2)</sup>                      | P.Val(*) | P.Val.Adj (**) |
|--------------------------------|-------------------|--------------------|-------------------|------------------------------------------|----------|----------------|
| <b>Weight growth (kg/year)</b> |                   |                    |                   |                                          |          |                |
| rs17782313                     | 3.2 ± 1.79        | 3.28 ± 1.68        | 3.36 ± 1.84       | 0.08 (-0.48-0.65) / 0.28 (-1.29-1.86)    | 0.909    | 1              |
| rs6548238                      | 3.33 ± 1.76       | 3.02 ± 1.71        | 3.29 ± 1.95       | -0.31 (-0.85-0.24) / 0.05 (-0.99-1.09)   | 0.523    | 1              |
| rs10938397                     | 3.29 ± 1.69       | 3.24 ± 1.91        | 3.11 ± 1.53       | -0.12 (-0.7-0.46) / -0.17 (-0.85-0.51)   | 0.874    | 1              |
| rs368794                       | 3.02 ± 1.83       | 3.36 ± 1.69        | 3.42 ± 1.70       | 0.31 (-0.22-0.83) / 0.43 (-0.35-1.22)    | 0.391    | 1              |
| rs2568958                      | 3.31 ± 1.59       | 3.08 ± 1.79        | 3.43 ± 2.06       | -0.22 (-0.75-0.31) / 0.12 (-0.62-0.87)   | 0.567    | 1              |
| rs925946                       | 3.13 ± 1.79       | 3.50 ± 1.70        | 2.60 ± 1.59       | 0.35 (-0.17-0.87) / -0.51 (-1.48-0.46)   | 0.167    | 1              |
| rs7647305                      | 3.19 ± 1.70       | 3.34 ± 1.90        | 3.05 ± 1.76       | 0.18 (-0.37-0.73) / -0.04 (-1.48-1.39)   | 0.804    | 1              |
| rs10913469                     | 3.07 ± 1.64       | 3.63 ± 1.80        | 3.30 ± 2.83       | 0.48 (-0.08-1.04) / 0.23 (-0.95-1.41)    | 0.241    | 1              |
| rs7190492                      | 3.21 ± 1.69       | 3.18 ± 1.75        | 3.45 ± 1.98       | -0.07 (-0.62-0.47) / 0.14 (-0.61-0.88)   | 0.852    | 1              |
| rs7903146                      | 3.41 ± 1.83       | 3.28 ± 1.78        | 2.53 ± 1.24       | -0.02 (-0.55-0.51) / -0.75 (-1.53-0.02)  | 0.130    | 1              |
| rs1137101                      | 3.52 ± 1.79       | 2.80 ± 1.49        | 3.99 ± 2.08       | -0.72 (-1.26--0.18) / 0.42 (-0.3-1.13)   | 0.001    | 0.012          |
| <b>Height growth (cm/year)</b> |                   |                    |                   |                                          |          |                |
| rs17782313                     | 5.73 ± 1.02       | 5.60 ± 0.93        | 5.98 ± 0.94       | -0.12 (-0.44-0.2) / 0.26 (-0.63-1.15)    | 0.608    | 1              |
| rs6548238                      | 5.81 ± 0.97       | 5.47 ± 1.01        | 5.61 ± 1.00       | -0.35 (-0.65--0.04) / -0.28 (-0.87-0.3)  | 0.070    | 0.774          |
| rs10938397                     | 5.75 ± 1.04       | 5.69 ± 1.00        | 5.63 ± 0.91       | -0.06 (-0.39-0.26) / -0.17 (-0.55-0.22)  | 0.690    | 1              |
| rs368794                       | 5.69 ± 0.93       | 5.80 ± 1.05        | 5.36 ± 0.91       | 0.12 (-0.17-0.41) / -0.42 (-0.85-0.02)   | 0.053    | 0.586          |
| rs2568958                      | 5.63 ± 1.07       | 5.75 ± 0.87        | 5.72 ± 1.12       | 0.12 (-0.18-0.42) / 0.1 (-0.32-0.52)     | 0.729    | 1              |
| rs925946                       | 5.65 ± 0.97       | 5.80 ± 1.,4        | 5.56 ± 0.86       | 0.15 (-0.14-0.44) / -0.09 (-0.64-0.46)   | 0.519    | 1              |
| rs7647305                      | 5.69 ± 1.03       | 5.71 ± 0.87        | 5.73 ± 1.13       | -0.01 (-0.32-0.3) / -0.04 (-0.86-0.77)   | 0.992    | 1              |
| rs10913469                     | 5.63 ± 0.90       | 5.74 ± 1.08        | 6.39 ± 1.51       | 0.16 (-0.16-0.47) / 0.81 (0.15-1.47)     | 0.045    | 0.498          |
| rs7190492                      | 5.69 ± 0.95       | 5.68 ± 1.06        | 5.78 ± 0.94       | -0.03 (-0.33-0.28) / 0.1 (-0.32-0.52)    | 0.840    | 1              |
| rs7903146                      | 5.76 ± 1.00       | 5.73 ± 0.95        | 5.37 ± 1.09       | -0.09 (-0.39-0.21) / -0.48 (-0.91--0.04) | 0.101    | 1              |
| rs1137101                      | 5.77 ± 0.85       | 5.56 ± 1.06        | 5.94 ± 1.00       | -0.21 (-0.52-0.1) / 0.23 (-0.18-0.64)    | 0.063    | 0.697          |

| <b>BMI variation (unitless)</b>         |               |              |               |                                          |       |       |
|-----------------------------------------|---------------|--------------|---------------|------------------------------------------|-------|-------|
| rs17782313                              | 2.21 ± 4.48   | 3.16 ± 5.21  | 2.83 ± 5.29   | 0.96 (-0.56-2.49) / 1.02 (-3.21-5.26)    | 0.434 | 1     |
| rs6548238                               | 2.53 ± 4.60   | 2.34 ± 4.64  | 3.03 ± 6.31   | -0.21 (-1.72-1.29) / 0.55 (-2.28-3.37)   | 0.875 | 1     |
| rs10938397                              | 2.24 ± 4.54   | 2.51 ± 4.82  | 2.80 ± 4.72   | 0.11 (-1.48-1.69) / 0.52 (-1.34-2.39)    | 0.843 | 1     |
| rs368794                                | 1.69 ± 4.91   | 2.71 ± 4.33  | 4.49 ± 4.73   | 0.94 (-0.46-2.35) / 2.73 (0.58-4.88)     | 0.041 | 0.452 |
| rs2568958                               | 2.82 ± 4.35   | 2.02 ± 4.84  | 3.10 ± 5.18   | -0.8 (-2.24-0.64) / 0.29 (-1.75-2.32)    | 0.421 | 1     |
| rs925946                                | 2.37 ± 4.81   | 3.03 ± 4.54  | 0.91 ± 4.55   | 0.55 (-0.87-1.97) / -1.4 (-4.03-1.23)    | 0.345 | 1     |
| rs7647305                               | 2.29 ± 4.41   | 3.01 ± 5.22  | 2.42 ± 6.27   | 0.71 (-0.8-2.21) / 0.19 (-3.69-4.07)     | 0.651 | 1     |
| rs10913469                              | 2.24 ± 4.55   | 3.30 ± 4.81  | 1.94 ± 6.22   | 0.96 (-0.57-2.49) / -0.18 (-3.38-3.02)   | 0.448 | 1     |
| rs7190492                               | 2.38 ± 4.49   | 2.63 ± 4.61  | 2.56 ± 5.60   | 0.06 (-1.43-1.55) / -0.11 (-2.12-1.91)   | 0.987 | 1     |
| rs7903146                               | 3.08 ± 4.63   | 2.43 ± 4.97  | 1.06 ± 3.86   | -0.44 (-1.9-1.03) / -1.82 (-3.93-0.3)    | 0.24  | 1     |
| rs1137101                               | 3.36 ± 5.04   | 1.63 ± 4.30  | 3.63 ± 4.87   | -1.73 (-3.23--0.23) / 0.24 (-1.76-2.23)  | 0.027 | 0.294 |
| <b>Fat mass variation (unitless)</b>    |               |              |               |                                          |       |       |
| rs17782313                              | 0.16 ± 13.13  | 2.8 ± 15.00  | 1.15 ± 20.41  | 2.59 (-1.9-7.08) / 0.23 (-12.2-12.65)    | 0.523 | 1     |
| rs6548238                               | 1.25 ± 13.75  | 1.1 ± 13.9   | -0.56 ± 16.34 | -0.15 (-4.59-4.3) / -0.61 (-8.92-7.69)   | 0.989 | 1     |
| rs10938397                              | -0.32 ± 11.57 | 0.6 ± 13.66  | 3.48 ± 16.74  | 1.46 (-3.19-6.11) / 4.71 (-0.75-10.17)   | 0.225 | 1     |
| rs368794                                | -1.23 ± 15.64 | 2.36 ± 12.34 | 3.88 ± 12.01  | 3.6 (-0.57-7.78) / 6.6 (0.25-12.96)      | 0.071 | 0.786 |
| rs2568958                               | 2.00 ± 13.21  | -0.74 ± 14.6 | 3.68 ± 13.28  | -2.58 (-6.83-1.67) / 1.62 (-4.36-7.6)    | 0.281 | 1     |
| rs925946                                | 0.88 ± 14.69  | 2.15 ± 13.02 | -3.05 ± 11.79 | 1.62 (-2.56-5.8) / -4.02 (-11.99-3.96)   | 0.374 | 1     |
| rs7647305                               | 1.30 ± 14.25  | 0.88 ± 12.21 | -4.17 ± 21.06 | 0.18 (-4.26-4.61) / -4.15 (-15.57-7.28)  | 0.764 | 1     |
| rs10913469                              | 0.68 ± 14.34  | 2.99 ± 13.19 | -4.01 ± 10.12 | 1.82 (-2.66-6.31) / -5.56 (-14.94-3.82)  | 0.316 | 1     |
| rs7190492                               | -0.01 ± 11.83 | 3.1 ± 15.44  | -1.11 ± 14.63 | 3.91 (-0.45-8.28) / -0.45 (-6.3-5.4)     | 0.142 | 1     |
| rs7903146                               | 2.37 ± 12.57  | 1.13 ± 14.65 | -2.6 ± 15.18  | -1.07 (-5.41-3.27) / -4.34 (-10.58-1.89) | 0.39  | 1     |
| rs1137101                               | 2.37 ± 13.71  | 0.00 ± 14.72 | 1.91 ± 11.76  | -2.21 (-6.72-2.3) / -1.09 (-7.06-4.89)   | 0.623 | 1     |
| <b>Muscle mass variation (unitless)</b> |               |              |               |                                          |       |       |
| rs17782313                              | 7.49 ± 5.09   | 7.18 ± 5.12  | 5.49 ± 4.19   | -0.17 (-1.67-1.34) / -1.4 (-5.35-2.54)   | 0.774 | 1     |
| rs6548238                               | 7.44 ± 5.12   | 6.68 ± 5.01  | 10.0 ± 3.86   | -0.77 (-2.24-0.7) / 1.43 (-1.91-4.78)    | 0.361 | 1     |
| rs10938397                              | 6.68 ± 5.86   | 7.61 ± 4.51  | 7.64 ± 5.00   | 0.54 (-1.02-2.1) / 0.18 (-1.69-2.04)     | 0.777 | 1     |
| rs368794                                | 6.96 ± 5.06   | 7.58 ± 5.37  | 7.74 ± 3.61   | 0.46 (-0.97-1.89) / -0.37 (-2.57-1.83)   | 0.684 | 1     |
| rs2568958                               | 6.51 ± 4.41   | 8.08 ± 5.34  | 7.32 ± 5.54   | 1.33 (-0.11-2.76) / 0.8 (-1.2-2.79)      | 0.191 | 1     |
| rs925946                                | 7.35 ± 5.19   | 7.29 ± 5.06  | 7.26 ± 4.3    | -0.32 (-1.75-1.11) / -0.16 (-2.8-2.48)   | 0.907 | 1     |
| rs7647305                               | 7.31 ± 5.26   | 7.45 ± 4.68  | 6.98 ± 4.87   | -0.83 (-2.3-0.63) / -2.27 (-5.87-1.33)   | 0.296 | 1     |
| rs10913469                              | 7.85 ± 5.45   | 6.40 ± 4.08  | 5.59 ± 3.64   | -0.84 (-2.34-0.67) / -0.95 (-4.11-2.21)  | 0.499 | 1     |
| rs7190492                               | 6.82 ± 4.86   | 8.02 ± 5.53  | 6.89 ± 4.12   | 0.23 (-1.28-1.73) / -0.7 (-2.73-1.33)    | 0.66  | 1     |

|                                                 |               |               |               |                                          |          |       |
|-------------------------------------------------|---------------|---------------|---------------|------------------------------------------|----------|-------|
| rs7903146                                       | 7.72 ± 5.27   | 6.95 ± 5.15   | 6.83 ± 3.45   | -1.21 (-2.66-0.24) / -1.97 (-4.07-0.14)  | 0.109    | 1     |
| rs1137101                                       | 6.81 ± 4.87   | 7.74 ± 5.05   | 6.76 ± 5.04   | 0.62 (-0.92-2.15) / 0.51 (-1.43-2.45)    | 0.723    | 1     |
| <b>Waist circumference variation (unitless)</b> |               |               |               |                                          |          |       |
| rs17782313                                      | 2.44 ± 4.47   | 2.76 ± 3.35   | 5.10 ± 5.34   | 0.34 (-1.03-1.7) / 2.91 (-0.9-6.73)      | 0.306    | 1     |
| rs6548238                                       | 2.71 ± 4.13   | 2.48 ± 4.20   | 2.10 ± 5.50   | -0.23 (-1.56-1.11) / -0.53 (-3.08-2.01)  | 0.886    | 1     |
| rs10938397                                      | 2.31 ± 4.31   | 2.54 ± 3.98   | 3.05 ± 4.60   | 0.13 (-1.29-1.55) / 0.76 (-0.91-2.42)    | 0.631    | 1     |
| rs368794                                        | 2.22 ± 4.48   | 2.69 ± 3.89   | 3.43 ± 4.42   | 0.43 (-0.86-1.71) / 1.25 (-0.66-3.15)    | 0.427    | 1     |
| rs2568958                                       | 2.92 ± 4.36   | 2.34 ± 3.90   | 2.47 ± 4.79   | -0.57 (-1.87-0.73) / -0.43 (-2.24-1.38)  | 0.679    | 1     |
| rs925946                                        | 2.59 ± 4.17   | 2.86 ± 4.41   | 1.36 ± 3.56   | 0.22 (-1.05-1.49) / -1.19 (-3.56-1.18)   | 0.521    | 1     |
| rs7647305                                       | 2.33 ± 3.95   | 3.20 ± 4.83   | 2.62 ± 3.69   | 0.91 (-0.42-2.24) / 0.41 (-3.08-3.89)    | 0.404    | 1     |
| rs10913469                                      | 2.28 ± 4.02   | 3.45 ± 4.51   | 2.50 ± 5.24   | 1.07 (-0.3-2.44) / 0.27 (-2.61-3.14)     | 0.307    | 1     |
| rs7190492                                       | 2.66 ± 4.18   | 2.40 ± 4.18   | 2.97 ± 4.55   | -0.37 (-1.7-0.96) / 0.12 (-1.69-1.93)    | 0.807    | 1     |
| rs7903146                                       | 3.12 ± 4.52   | 2.49 ± 4.28   | 1.43 ± 2.70   | -0.48 (-1.8-0.83) / -1.53 (-3.43-0.37)   | 0.281    | 1     |
| rs1137101                                       | 3.80 ± 4.35   | 1.51 ± 3.91   | 3.70 ± 4.13   | -2.3 (-3.61--0.99) / -0.16 (-1.91-1.6)   | 9.11e-04 | 0.010 |
| <b>Triceps fold variation (unitless)</b>        |               |               |               |                                          |          |       |
| rs17782313                                      | 0.23 ± 15.79  | 0.97 ± 16.52  | 4.33 ± 19.34  | 0.88 (-4.36-6.11) / 5.2 (-9.32-19.72)    | 0.753    | 1     |
| rs6548238                                       | 0.20 ± 14.22  | 0.38 ± 16.85  | 3.97 ± 27.41  | 0.07 (-5.01-5.16) / 3.13 (-6.54-12.8)    | 0.813    | 1     |
| rs10938397                                      | -0.07 ± 11.83 | 0.38 ± 17.71  | 1.32 ± 17.25  | -0.12 (-5.52-5.28) / 0.83 (-5.52-7.17)   | 0.947    | 1     |
| rs368794                                        | -0.27 ± 18.12 | 0.92 ± 14.45  | 1.2 ± 14.21   | 1.07 (-3.84-5.98) / 0.52 (-6.77-7.8)     | 0.912    | 1     |
| rs2568958                                       | 2.83 ± 14.83  | -1.12 ± 16.49 | -1.19 ± 17.18 | -4.05 (-8.95-0.86) / -3.85 (-10.78-3.08) | 0.233    | 1     |
| rs925946                                        | 0.01 ± 16.67  | 2.12 ± 15.25  | -4.7 ± 14.42  | 1.86 (-2.96-6.68) / -4.39 (-13.69-4.91)  | 0.406    | 1     |
| rs7647305                                       | 0.64 ± 15.21  | 0.8 ± 17.91   | -6.37 ± 14.25 | -0.28 (-5.36-4.8) / -7.81 (-21.06-5.43)  | 0.509    | 1     |
| rs10913469                                      | -0.82 ± 15.43 | 3.73 ± 16.21  | 0.88 ± 21.97  | 4.73 (-0.47-9.93) / 2.42 (-8.46-13.31)   | 0.199    | 1     |
| rs7190492                                       | 0.25 ± 13.37  | 0.36 ± 16.66  | 1.54 ± 21.02  | -0.56 (-5.63-4.5) / 0.6 (-6.34-7.54)     | 0.941    | 1     |
| rs7903146                                       | 2.52 ± 17.07  | -0.13 ± 15.32 | -3.69 ± 14.44 | -2.56 (-7.53-2.42) / -6.42 (-13.61-0.76) | 0.199    | 1     |
| rs1137101                                       | 2.76 ± 17.55  | -1.93 ± 15.68 | 3.57 ± 12.86  | -4.78 (-9.88-0.33) / 1.17 (-5.64-7.99)   | 0.075    | 0.823 |

CH, Common Homocygote; Het, Heterocygote; VH, Variant Homocygote

(1) Mean ± Sd

(2) Co-dominant genetic model (AA vs Aa / AA vs aa)

(\*) P.val of SNP adjusted by age and sex

(\*\*) Bonferroni-corrected p.value

SNPs selection (Major allele/minor allele): rs17782313 (T/C); rs6548238 (C/T); rs10938397 (A/G); rs368794 (A/T); rs2568958 (A/G); rs925946 (G/T); rs7647305 (C/T); rs10913469 (T/C); rs7190492 (G/A); rs7903146 (C/T); rs1137101 (A/G).
